# Supplementary material for: T2*-Mapping of Knee Cartilage in Response to Mechanical Loading in Alpine Skiing: A Feasibility Study
Source: MDPI journal article supplement (doi:10.3390/diagnostics12061391), 2022-06-04
Supplement: s1 [file s1]

### Supplementary Materials:

#### Sublementary files

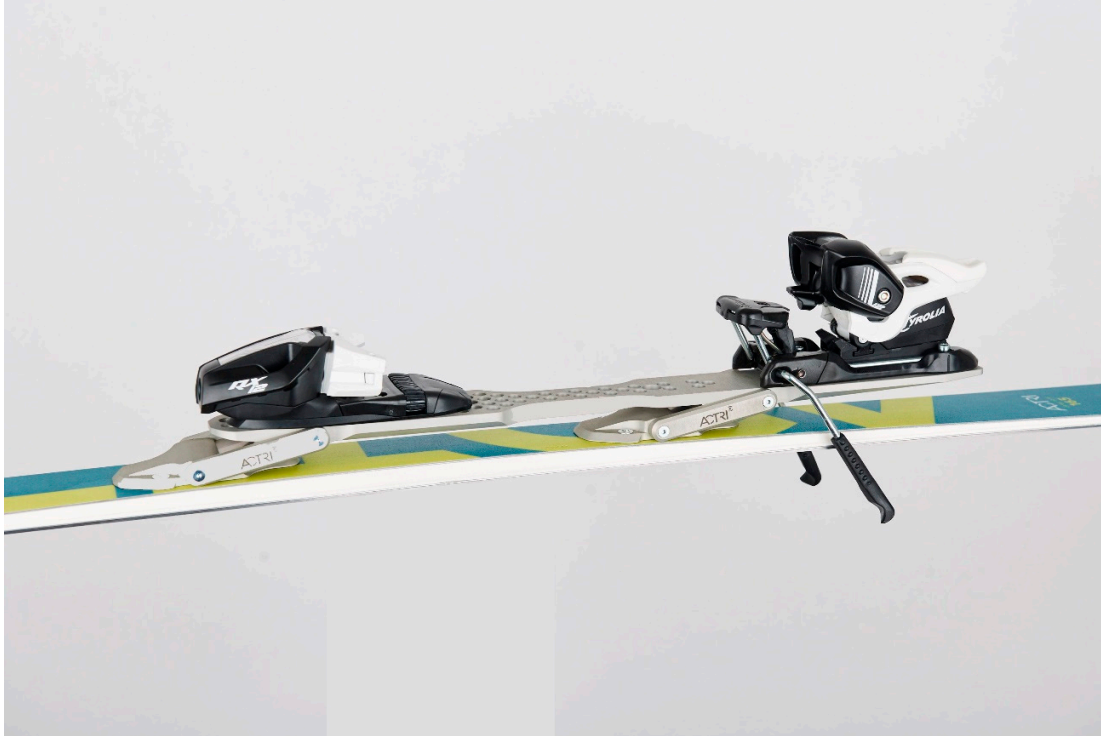

**Figure S1:** Ski with Suspended Ski Binding System ACTRI F. The damping plate consists of duralumin with pressed-in plain bearing sleeves and inserted leaf spring made of austenitic stainless chromium-nickel steel.

**Table S1:** Mean chondral Ht (mm) in FTJ and retropatellar.

| joint                      | side  | subject | baseline<br>1 | fu 1-1 | fu 1-2 | recovery | baseline<br>2 | fu 2-1 | fu 2-2 | mean<br>SD |
|----------------------------|-------|---------|---------------|--------|--------|----------|---------------|--------|--------|------------|
| FTJ<br>lateral<br>femoral  | right | 1       | 2.53          | 2.39   | 2.48   | 2.68     | 2.41          | 2.03   | 2.28   | 0.22       |
|                            |       | 2       | 3.04          | 2.75   | 3.41   | 2.85     | 3.15          | 3.00   | 2.96   | 0.24       |
|                            |       | 3       | 2.40          | 2.25   | 2.34   | 2.99     | 2.54          | 2.39   | 2.48   | 0.27       |
|                            |       | 4       | 3.24          | 2.71   | 3.11   | 3.35     | 3.29          | 2.91   | 3.14   | 0.30       |
|                            | left  | 1       | 2.48          | 2.29   | 2.21   | 2.28     | 2.26          | 2.14   | 2.19   | 0.16       |
|                            |       | 2       | 3.31          | 2.80   | 2.93   | 2.90     | 2.96          | 2.98   | 2.99   | 0.38       |
|                            |       | 3       | 2.36          | 2.14   | 2.23   | 2.29     | 2.40          | 2.20   | 2.21   | 0.16       |
|                            |       | 4       | 2.81          | 2.94   | 2.78   | 2.49     | 2.76          | 2.50   | 2.66   | 0.21       |
| FTJ<br>lateral<br>tibial   | right | 1       | 3.25          | 3.26   | 3.16   | 3.23     | 3.08          | 2.73   | 3.13   | 0.24       |
|                            |       | 2       | 2.76          | 2.83   | 3.13   | 2.85     | 2.65          | 2.74   | 2.88   | 0.24       |
|                            |       | 3       | 2.49          | 2.29   | 2.30   | 2.81     | 2.55          | 2.16   | 2.35   | 0.24       |
|                            |       | 4       | 3.23          | 2.79   | 2.91   | 3.29     | 3.21          | 2.99   | 3.18   | 0.26       |
|                            | left  | 1       | 3.09          | 2.69   | 2.49   | 2.63     | 2.63          | 2.51   | 2.58   | 0.25       |
|                            |       | 2       | 2.98          | 2.78   | 2.89   | 2.99     | 2.83          | 2.84   | 2.84   | 0.17       |
|                            |       | 3       | 2.33          | 2.00   | 2.18   | 2.39     | 2.40          | 2.36   | 2.29   | 0.18       |
|                            |       | 4       | 3.30          | 3.06   | 3.01   | 2.84     | 3.19          | 3.00   | 3.24   | 0.25       |
| FTJ<br>medial<br>femoral   | right | 1       | 2.64          | 2.36   | 2.51   | 2.60     | 2.55          | 2.38   | 2.68   | 0.21       |
|                            |       | 2       | 2.48          | 2.41   | 2.50   | 2.45     | 2.63          | 2.71   | 2.65   | 0.15       |
|                            |       | 3       | 1.71          | 1.71   | 1.58   | 1.91     | 1.86          | 1.84   | 1.66   | 0.16       |
|                            |       | 4       | 2.59          | 2.66   | 2.43   | 2.76     | 2.33          | 2.69   | 2.66   | 0.21       |
|                            | left  | 1       | 2.59          | 2.85   | 2.76   | 2.79     | 2.45          | 2.74   | 2.64   | 0.16       |
|                            |       | 2       | 2.66          | 2.98   | 2.44   | 2.65     | 2.59          | 2.63   | 2.33   | 0.27       |
|                            |       | 3       | 1.99          | 1.65   | 1.65   | 1.90     | 1.73          | 1.78   | 1.74   | 0.18       |
|                            |       | 4       | 2.90          | 2.58   | 2.70   | 2.56     | 2.55          | 2.61   | 2.70   | 0.20       |
| FTJ<br>medial<br>tibial    | right | 1       | 1.70          | 1.98   | 1.93   | 1.98     | 1.90          | 1.98   | 2.05   | 0.18       |
|                            |       | 2       | 1.75          | 1.81   | 2.04   | 1.89     | 2.03          | 1.79   | 1.99   | 0.20       |
|                            |       | 3       | 1.68          | 1.81   | 1.81   | 1.65     | 1.79          | 1.66   | 1.53   | 0.19       |
|                            |       | 4       | 1.89          | 1.94   | 1.91   | 1.76     | 1.98          | 1.91   | 1.84   | 0.17       |
|                            | left  | 1       | 1.88          | 2.15   | 2.06   | 1.96     | 1.98          | 1.95   | 1.94   | 0.16       |
|                            |       | 2       | 2.25          | 2.35   | 1.90   | 2.10     | 2.15          | 2.13   | 1.98   | 0.26       |
|                            |       | 3       | 1.91          | 1.84   | 1.68   | 1.58     | 1.84          | 1.71   | 1.76   | 0.16       |
|                            |       | 4       | 2.01          | 1.89   | 1.83   | 1.99     | 2.00          | 1.71   | 1.75   | 0.18       |
| FPJ<br>retro-<br>pattellar | right | 1       | 3.56          | 3.23   | 3.71   | 3.70     | 3.63          | 3.40   | 3.41   | 0.27       |
|                            |       | 2       | 3.05          | 2.91   | 3.16   | 2.63     | 2.78          | 2.55   | 2.80   | 0.45       |
|                            |       | 3       | 2.44          | 2.10   | 2.11   | 2.14     | 2.50          | 2.51   | 2.31   | 0.25       |
|                            |       | 4       | 2.40          | 2.18   | 2.38   | 2.54     | 2.49          | 2.28   | 2.28   | 0.20       |
|                            | left  | 1       | 3.49          | 3.65   | 3.58   | 3.34     | 3.71          | 3.34   | 3.54   | 0.31       |
|                            |       | 2       | 2.79          | 2.78   | 2.54   | 2.60     | 2.91          | 3.14   | 2.73   | 0.29       |
|                            |       | 3       | 2.40          | 2.09   | 2.38   | 2.21     | 2.05          | 2.25   | 1.99   | 0.27       |
|                            |       | 4       | 3.43          | 2.83   | 3.14   | 3.33     | 3.11          | 3.11   | 3.20   | 0.33       |

**Table S2:** Mean Segmental Intrachondral T2\*-time (ms) with SD in FTJ and retropatellar.

| joint                      | side  | subject | baseline<br>1 | fu 1-<br>1 | fu 1-<br>2 | recovery | baseline<br>2 | fu 2-<br>1 | fu 2-<br>2 | mean SD |
|----------------------------|-------|---------|---------------|------------|------------|----------|---------------|------------|------------|---------|
| FTJ<br>lateral<br>femoral  | right | 1       | 30.7          | 29.0       | 29.6       | 31.7     | 30.3          | 30.9       | 32.1       | 1.85    |
|                            |       | 2       | 31.9          | 30.6       | 31.3       | 31.1     | 31.5          | 31.6       | 32.0       | 1.93    |
|                            |       | 3       | 26.8          | 26.2       | 24.6       | 25.2     | 26.1          | 27.9       | 24.2       | 2.23    |
|                            |       | 4       | 25.5          | 27.8       | 26.2       | 30.0     | 26.7          | 26.0       | 26.6       | 2.32    |
|                            | left  | 1       | 29.8          | 31.6       | 32.1       | 33.3     | 32.0          | 32.8       | 34.1       | 2.13    |
|                            |       | 2       | 31.1          | 29.7       | 30.2       | 31.5     | 30.8          | 30.8       | 30.8       | 1.88    |
|                            |       | 3       | 25.3          | 25.7       | 23.9       | 25.8     | 25.6          | 25.4       | 26.4       | 1.52    |
|                            |       | 4       | 26.2          | 26.2       | 28.2       | 29.8     | 26.5          | 27.6       | 25.9       | 2.42    |
| FTJ<br>lateral<br>tibial   | right | 1       | 18.9          | 19.7       | 20.1       | 20.3     | 19.3          | 22.1       | 20.8       | 1.58    |
|                            |       | 2       | 19.2          | 18.7       | 18.7       | 19.8     | 18.7          | 19.3       | 19.4       | 1.32    |
|                            |       | 3       | 18.3          | 17.5       | 17.5       | 15.6     | 17.3          | 18.5       | 16.4       | 1.40    |
|                            |       | 4       | 19.2          | 21.4       | 20.4       | 19.7     | 20.4          | 20.5       | 20.0       | 1.48    |
|                            | left  | 1       | 22.2          | 23.4       | 24.4       | 24.6     | 22.4          | 24.1       | 23.1       | 1.81    |
|                            |       | 2       | 19.5          | 20.1       | 18.7       | 20.0     | 20.4          | 19.4       | 18.0       | 1.48    |
|                            |       | 3       | 17.8          | 18.6       | 17.4       | 17.7     | 17.4          | 17.6       | 17.2       | 1.16    |
|                            |       | 4       | 20.4          | 20.2       | 21.5       | 23.2     | 21.4          | 20.3       | 19.9       | 1.78    |
| FTJ<br>medial<br>femoral   | right | 1       | 28.8          | 26.4       | 26.5       | 28.0     | 26.4          | 26.6       | 27.8       | 2.10    |
|                            |       | 2       | 29.9          | 28.3       | 25.1       | 27.7     | 27.9          | 28.9       | 26.6       | 2.42    |
|                            |       | 3       | 22.5          | 22.7       | 22.2       | 22.1     | 23.8          | 23.5       | 23.1       | 1.56    |
|                            |       | 4       | 27.1          | 27.3       | 26.5       | 28.1     | 26.6          | 26.8       | 25.9       | 1.70    |
|                            | left  | 1       | 28.0          | 27.2       | 26.9       | 28.2     | 27.2          | 27.6       | 27.1       | 1.47    |
|                            |       | 2       | 30.2          | 30.3       | 28.5       | 31.5     | 30.3          | 29.0       | 27.4       | 3.03    |
|                            |       | 3       | 22.6          | 24.2       | 23.2       | 23.3     | 23.5          | 23.4       | 22.3       | 1.20    |
|                            |       | 4       | 24.0          | 24.7       | 24.3       | 28.1     | 25.3          | 24.9       | 23.4       | 2.13    |
| FTJ<br>medial<br>tibial    | right | 1       | 24.1          | 23.5       | 21.7       | 23.7     | 22.9          | 21.7       | 22.3       | 1.74    |
|                            |       | 2       | 27.5          | 25.0       | 25.0       | 24.2     | 25.2          | 27.3       | 22.8       | 2.63    |
|                            |       | 3       | 22.6          | 21.8       | 20.3       | 22.6     | 22.8          | 22.1       | 21.4       | 1.64    |
|                            |       | 4       | 22.7          | 21.4       | 22.4       | 23.3     | 23.0          | 23.1       | 23.1       | 1.42    |
|                            | left  | 1       | 21.7          | 19.8       | 20.8       | 22.4     | 22.8          | 21.6       | 22.0       | 1.66    |
|                            |       | 2       | 24.8          | 21.4       | 25.4       | 25.6     | 24.5          | 24.1       | 23.3       | 3.21    |
|                            |       | 3       | 20.8          | 21.6       | 20.8       | 22.6     | 22.0          | 21.7       | 20.5       | 1.38    |
|                            |       | 4       | 19.2          | 20.6       | 19.9       | 20.1     | 20.8          | 19.7       | 21.4       | 1.52    |
| FPJ<br>retro-<br>pattellar | right | 1       | 29.9          | 28.2       | 29.2       | 33.0     | 30.7          | 30.1       | 29.7       | 2.20    |
|                            |       | 2       | 29.7          | 28.9       | 29.9       | 30.3     | 28.5          | 28.1       | 29.0       | 2.68    |
|                            |       | 3       | 27.1          | 24.3       | 25.3       | 26.0     | 25.6          | 26.2       | 25.8       | 1.40    |
|                            |       | 4       | 21.0          | 24.1       | 22.6       | 22.2     | 23.1          | 21.9       | 23.6       | 1.61    |
|                            | left  | 1       | 30.8          | 29.7       | 28.2       | 31.6     | 30.2          | 29.0       | 29.6       | 2.34    |
|                            |       | 2       | 27.9          | 28.3       | 27.6       | 30.4     | 29.7          | 28.5       | 29.3       | 2.09    |
|                            |       | 3       | 26.6          | 27.0       | 25.9       | 26.8     | 25.8          | 26.5       | 25.2       | 1.57    |
|                            |       | 4       | 20.0          | 21.4       | 21.1       | 21.0     | 20.8          | 20.7       | 21.0       | 1.21    |
